# Supplementary material for: Assessment of Remote Vital Sign Monitoring and Alarms in a Real-World Healthcare at Home Dataset
Source: MDPI journal article supplement (doi:10.3390/bioengineering10010037), 2022-12-28
Supplement: s1 [file s1]

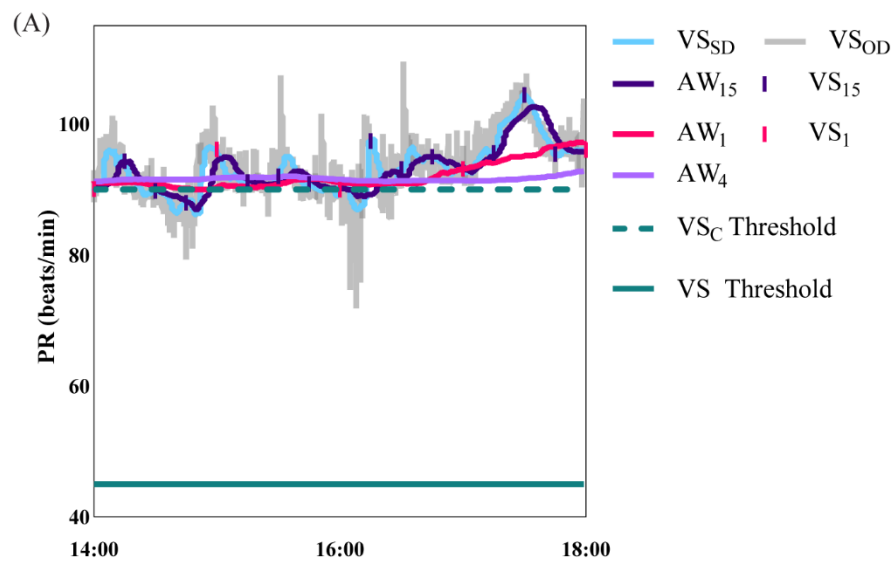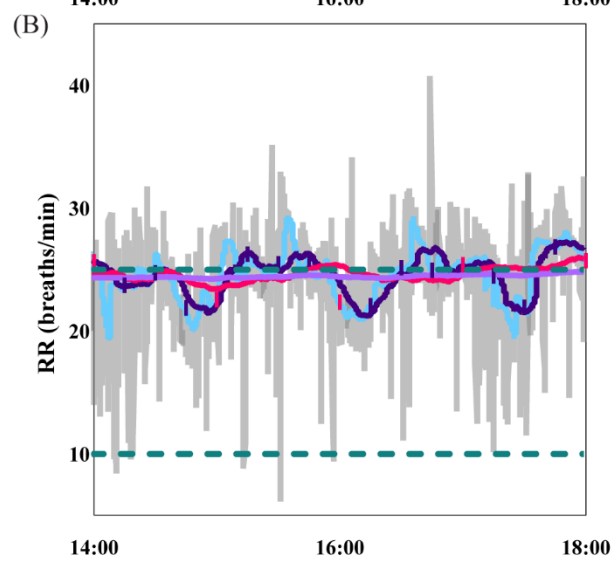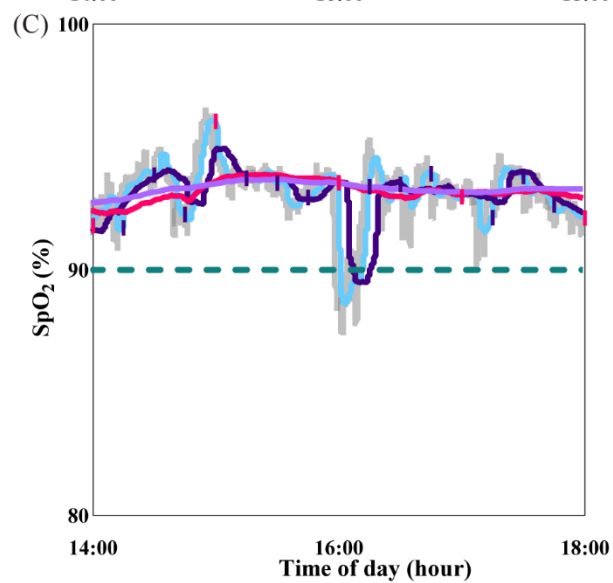

**Figure S1.** An example of vital sign data at different observation rates and aggregation windows (AW) during a 4-hour assessment window in one patient. (A) Pulse rate (PR); (B) Respiratory rate (RR); (C) Oxygen saturation (SpO<sub>2</sub>). The vital sign threshold values in this example were selected from A<sub>3</sub>. Solid horizontal lines are thresholds used in single vital sign rules (VS Threshold) and dashed horizontal lines are thresholds used in combination rules (VS<sub>C</sub> Threshold).  $VS_{OD}$  = original dataset;  $VS_{SD}$  = 5-minute aggregation window;  $VS_{15}$  = 15-minute observation rate;  $VS_1$  = 1-hour observation rate;  $AW_{15}$  = 15-minute aggregation window;  $AW_1$  = 1-hour aggregation window;  $AW_4$  = 4-hour aggregation window.

The variability in the original vital sign dataset was reduced with a 5-minute aggregation window ( $VS_{SD}$ ). An example of the difference in vital sign value between smoothed (aggregation window) vs. downsampled data was observed in the SpO<sub>2</sub> values of  $VS_1$  and  $AW_1$  at approximately 15:00 (panel C). This difference demonstrates one benefit of incorporating the last hour of vital sign observations ( $AW_1$ ). In  $VS_1$ , the SpO<sub>2</sub> value at 15:00 was ~5% higher than at 14:00 and 16:00. However, vital sign data smoothed with longer aggregation windows took longer to react to temporary changes in the trend. This was apparent in PR (panel A) and RR (panel C). Pulse rate for  $AW_4$  remained above VS<sub>C</sub> Threshold (PR = 90 beats/min) during the 4-hour assessment window whereas PR for other conditions fluctuated above and below the threshold. Respiratory rate for  $AW_4$  remained below the VS<sub>C</sub> Threshold during the 4-hour assessment window while other conditions breached the threshold. An alarm was not triggered for  $AW_4$  during this assessment window.
