# Supplementary material for: Assessment of Remote Vital Sign Monitoring and Alarms in a Real-World Healthcare at Home Dataset
Source: MDPI journal article supplement (doi:10.3390/bioengineering10010037), 2022-12-28
Supplement: s1 [file s1]

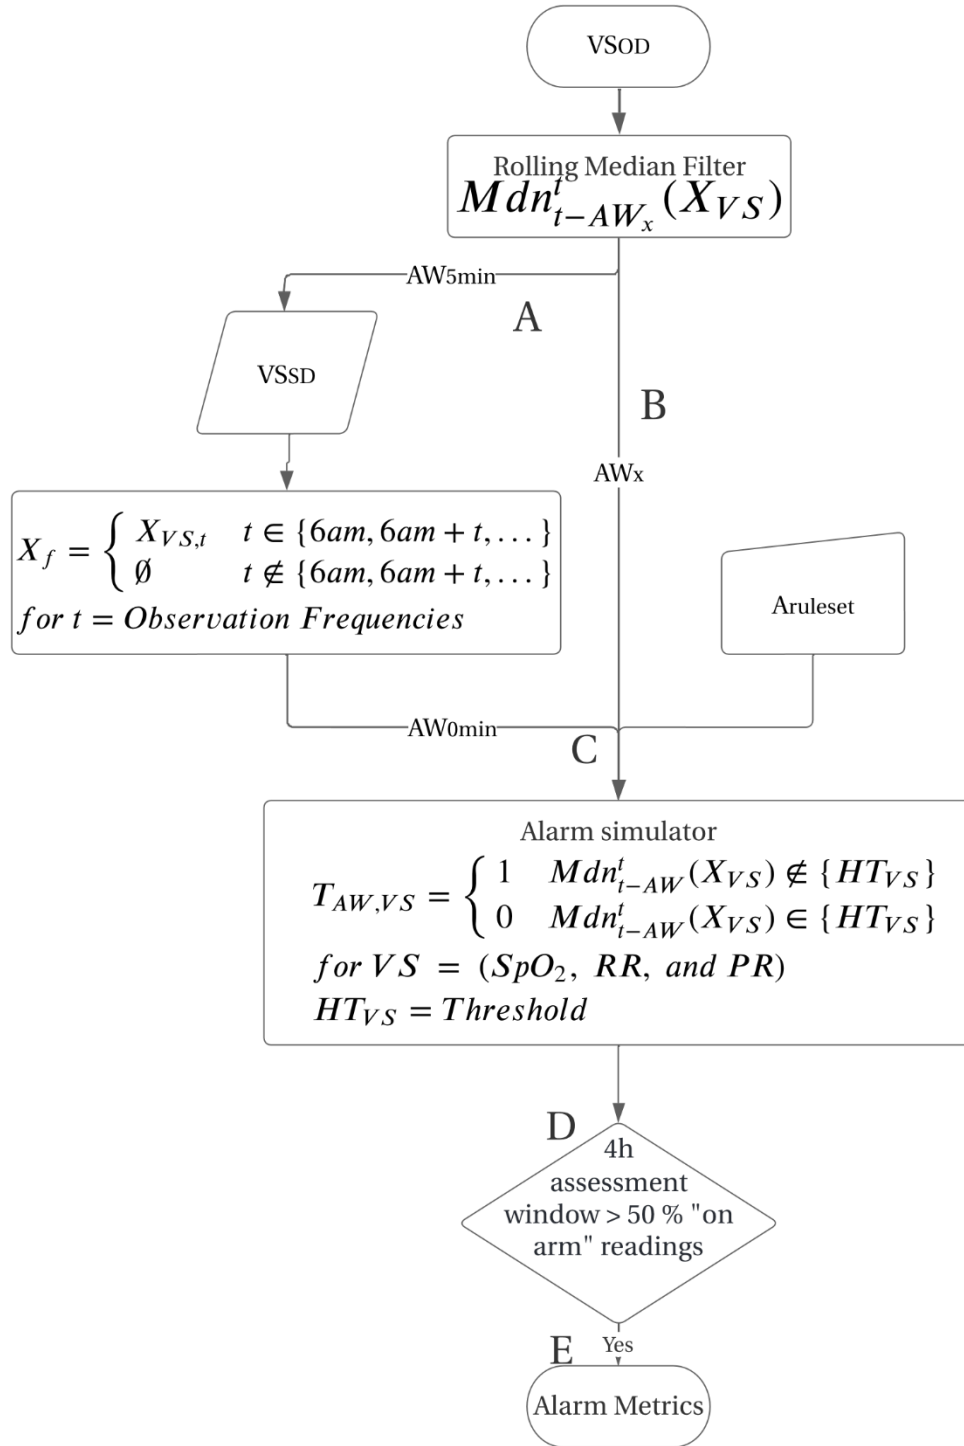

**Figure S2. Diagram of data processing and alarm simulator:** test conditions were created with the vital sign observation dataset ( $VS_{OD}$ ) by (A) filtering with a 5-minute aggregation window ( $AW_{5min}$ ) and downsampling, or (B) passing  $VS_{OD}$  through an alarm simulator with different aggregation windows ( $AW_x$ ) applied to the rolling median filter.  $Mdn$  = Median. (A)  $VSSD$  was created with a 5-minute rolling median filter ( $AW_{5min}$ ) and then downsampled to 4 vital sign observation frequencies.  $t = 15min, 1hr, 4hr, 12hr$ .  $X_{VS}$  = Pulse Rate, Respiratory Rate, or

Oxygen Saturation array.  $\emptyset$  = no data. (B)  $VS_{OD}$  was passed through the rolling median filter with different sized aggregation windows ( $AW_x$ ).  $AW_x = 5\text{min}$  ( $VS_{SD}$ ), 15min, 1hr, 4hr. (C) Test conditions were passed through the alarm simulator with defined rulesets outlined in Table 1 ( $A_{ruleset}$ ). Downsampled data passed through the alarm simulator with  $AW_x = 0$  min. Triggers ( $T_{AW,VS}$ ) were created for each condition. For combination rules, triggers ( $T_{AW}$ ) for each  $AW$  were created by summarizing across the  $T_{AW,VS}$  for the vital signs included in the combination rule:  $T_{AW}$  are equal to 1 when all the  $T_{AW,VS}$  in the rule are equal to 1 within 30s of each other. (D) A patient's length of stay was divided into 4-hour windows. 4-hour windows with  $> 50\%$  adherence were included in alarm assessment. (E) Alarm triggers ( $T_{AW,VS}$ ) were grouped into the 4-hour assessment windows and counted as a positive alarm window ( $W_{AP}$ ). The alarm metrics alarm rate, patient rate, and early detection time (EDT) were calculated based on  $W_{AP}$ .
