# Supplementary material for: Assessment of Remote Vital Sign Monitoring and Alarms in a Real-World Healthcare at Home Dataset
Source: MDPI journal article supplement (doi:10.3390/bioengineering10010037), 2022-12-28
Supplement: s1 [file s1]

**Table S1.** Alarm rule metrics

| Ruleset        | Alarm               | Observation Rate | Aggregation Window | $W_{AP}$ | Patient Rate (%) | Alarm Rate      |
|----------------|---------------------|------------------|--------------------|----------|------------------|-----------------|
| A <sub>1</sub> | A <sub>1</sub> - 01 | $VS_{I2}$        | $AW_0$             | 1        | 1.32             | $0 \pm 0.04$    |
|                | A <sub>1</sub> - 02 | $VS_{I2}$        | $AW_0$             | 157      | 44.74            | $0.22 \pm 0.47$ |
|                | A <sub>1</sub> - 03 | $VS_{I2}$        | $AW_0$             | 97       | 44.74            | $0.14 \pm 0.38$ |
|                | A <sub>1</sub> - 04 | $VS_{I2}$        | $AW_0$             | 0        | 0                | $0 \pm 0$       |
|                | A <sub>1</sub> - 05 | $VS_{I2}$        | $AW_0$             | 1        | 1.32             | $0 \pm 0.04$    |
|                | A <sub>1</sub> - 06 | $VS_{I2}$        | $AW_0$             | 0        | 0                | $0 \pm 0$       |
|                | A <sub>1</sub> - 07 | $VS_{I2}$        | $AW_0$             | 3        | 3.95             | $0 \pm 0.07$    |
|                | A <sub>1</sub> - 08 | $VS_{I2}$        | $AW_0$             | 1        | 1.32             | $0 \pm 0.04$    |
|                | A <sub>1</sub> - 09 | $VS_{I2}$        | $AW_0$             | 0        | 0                | $0 \pm 0$       |
|                | A <sub>1</sub> - 10 | $VS_{I2}$        | $AW_0$             | 0        | 0                | $0 \pm 0$       |
| A <sub>2</sub> | A <sub>2</sub> - 01 | $VS_{I2}$        | $AW_0$             | 133      | 50               | $0.19 \pm 0.45$ |
|                | A <sub>2</sub> - 02 | $VS_{I2}$        | $AW_0$             | 82       | 21.05            | $0.12 \pm 0.36$ |
|                | A <sub>2</sub> - 03 | $VS_{I2}$        | $AW_0$             | 107      | 36.84            | $0.15 \pm 0.39$ |
|                | A <sub>2</sub> - 04 | $VS_{I2}$        | $AW_0$             | 446      | 82.89            | $0.63 \pm 0.73$ |
|                | A <sub>2</sub> - 05 | $VS_{I2}$        | $AW_0$             | 3        | 3.95             | $0 \pm 0.07$    |
| A <sub>3</sub> | A <sub>3</sub> - 01 | $VS_{I2}$        | $AW_0$             | 53       | 19.74            | $0.07 \pm 0.29$ |
|                | A <sub>3</sub> - 02 | $VS_{I2}$        | $AW_0$             | 15       | 15.79            | $0.02 \pm 0.14$ |
|                | A <sub>3</sub> - 03 | $VS_{I2}$        | $AW_0$             | 0        | 0                | $0 \pm 0$       |
|                | A <sub>3</sub> - 04 | $VS_{I2}$        | $AW_0$             | 2        | 2.63             | $0 \pm 0.05$    |
| A <sub>1</sub> | A <sub>1</sub> - 01 | $VS_4$           | $AW_0$             | 1        | 1.32             | $0 \pm 0.04$    |
|                | A <sub>1</sub> - 02 | $VS_4$           | $AW_0$             | 463      | 64.47            | $0.65 \pm 1.14$ |
|                | A <sub>1</sub> - 03 | $VS_4$           | $AW_0$             | 273      | 61.84            | $0.39 \pm 0.86$ |
|                | A <sub>1</sub> - 04 | $VS_4$           | $AW_0$             | 0        | 0                | $0 \pm 0$       |
|                | A <sub>1</sub> - 05 | $VS_4$           | $AW_0$             | 3        | 3.95             | $0 \pm 0.07$    |
|                | A <sub>1</sub> - 06 | $VS_4$           | $AW_0$             | 0        | 0                | $0 \pm 0$       |
|                | A <sub>1</sub> - 07 | $VS_4$           | $AW_0$             | 10       | 6.58             | $0.01 \pm 0.12$ |
|                | A <sub>1</sub> - 08 | $VS_4$           | $AW_0$             | 1        | 1.32             | $0 \pm 0.04$    |
|                | A <sub>1</sub> - 09 | $VS_4$           | $AW_0$             | 1        | 1.32             | $0 \pm 0.04$    |
|                | A <sub>1</sub> - 10 | $VS_4$           | $AW_0$             | 0        | 0                | $0 \pm 0$       |
| A <sub>2</sub> | A <sub>2</sub> - 01 | $VS_4$           | $AW_0$             | 378      | 71.05            | $0.53 \pm 1.00$ |
|                | A <sub>2</sub> - 02 | $VS_4$           | $AW_0$             | 260      | 38.16            | $0.37 \pm 0.94$ |
|                | A <sub>2</sub> - 03 | $VS_4$           | $AW_0$             | 249      | 44.74            | $0.35 \pm 0.84$ |
|                | A <sub>2</sub> - 04 | $VS_4$           | $AW_0$             | 1275     | 93.42            | $1.80 \pm 1.80$ |
|                | A <sub>2</sub> - 05 | $VS_4$           | $AW_0$             | 6        | 6.58             | $0.01 \pm 0.09$ |
| A <sub>3</sub> | A <sub>3</sub> - 01 | $VS_4$           | $AW_0$             | 149      | 36.84            | $0.21 \pm 0.65$ |
|                | A <sub>3</sub> - 02 | $VS_4$           | $AW_0$             | 49       | 25               | $0.07 \pm 0.33$ |
|                | A <sub>3</sub> - 03 | $VS_4$           | $AW_0$             | 0        | 0                | $0 \pm 0$       |
|                | A <sub>3</sub> - 04 | $VS_4$           | $AW_0$             | 5        | 3.95             | $0.01 \pm 0.08$ |
| A <sub>1</sub> | A <sub>1</sub> - 01 | $VS_I$           | $AW_0$             | 2        | 2.63             | $0 \pm 0.05$    |

|                |                     |                  |                 |      |       |             |
|----------------|---------------------|------------------|-----------------|------|-------|-------------|
|                | A <sub>1</sub> - 02 | VS <sub>I</sub>  | AW <sub>0</sub> | 973  | 82.89 | 1.37 ± 1.65 |
|                | A <sub>1</sub> - 03 | VS <sub>I</sub>  | AW <sub>0</sub> | 663  | 77.63 | 0.94 ± 1.39 |
|                | A <sub>1</sub> - 04 | VS <sub>I</sub>  | AW <sub>0</sub> | 2    | 1.32  | 0 ± 0.08    |
|                | A <sub>1</sub> - 05 | VS <sub>I</sub>  | AW <sub>0</sub> | 7    | 6.58  | 0.01 ± 0.11 |
|                | A <sub>1</sub> - 06 | VS <sub>I</sub>  | AW <sub>0</sub> | 0    | 0     | 0 ± 0       |
|                | A <sub>1</sub> - 07 | VS <sub>I</sub>  | AW <sub>0</sub> | 18   | 13.16 | 0.03 ± 0.16 |
|                | A <sub>1</sub> - 08 | VS <sub>I</sub>  | AW <sub>0</sub> | 2    | 2.63  | 0 ± 0.05    |
|                | A <sub>1</sub> - 09 | VS <sub>I</sub>  | AW <sub>0</sub> | 2    | 1.32  | 0 ± 0.08    |
|                | A <sub>1</sub> - 10 | VS <sub>I</sub>  | AW <sub>0</sub> | 0    | 0     | 0 ± 0       |
| A <sub>2</sub> | A <sub>2</sub> - 01 | VS <sub>I</sub>  | AW <sub>0</sub> | 863  | 88.16 | 1.22 ± 1.59 |
|                | A <sub>2</sub> - 02 | VS <sub>I</sub>  | AW <sub>0</sub> | 461  | 52.63 | 0.65 ± 1.30 |
|                | A <sub>2</sub> - 03 | VS <sub>I</sub>  | AW <sub>0</sub> | 500  | 57.89 | 0.71 ± 1.33 |
|                | A <sub>2</sub> - 04 | VS <sub>I</sub>  | AW <sub>0</sub> | 2060 | 98.68 | 2.91 ± 2.11 |
|                | A <sub>2</sub> - 05 | VS <sub>I</sub>  | AW <sub>0</sub> | 33   | 17.11 | 0.05 ± 0.24 |
| A <sub>3</sub> | A <sub>3</sub> - 01 | VS <sub>I</sub>  | AW <sub>0</sub> | 331  | 51.32 | 0.47 ± 1.04 |
|                | A <sub>3</sub> - 02 | VS <sub>I</sub>  | AW <sub>0</sub> | 144  | 34.21 | 0.2 ± 0.64  |
|                | A <sub>3</sub> - 03 | VS <sub>I</sub>  | AW <sub>0</sub> | 1    | 1.32  | 0 ± 0.04    |
|                | A <sub>3</sub> - 04 | VS <sub>I</sub>  | AW <sub>0</sub> | 15   | 5.26  | 0.02 ± 0.23 |
| A <sub>1</sub> | A <sub>1</sub> - 01 | VS <sub>I5</sub> | AW <sub>0</sub> | 4    | 5.26  | 0.01 ± 0.08 |
|                | A <sub>1</sub> - 02 | VS <sub>I5</sub> | AW <sub>0</sub> | 1428 | 90.79 | 2.01 ± 1.92 |
|                | A <sub>1</sub> - 03 | VS <sub>I5</sub> | AW <sub>0</sub> | 1017 | 84.21 | 1.43 ± 1.70 |
|                | A <sub>1</sub> - 04 | VS <sub>I5</sub> | AW <sub>0</sub> | 4    | 3.95  | 0.01 ± 0.09 |
|                | A <sub>1</sub> - 05 | VS <sub>I5</sub> | AW <sub>0</sub> | 14   | 11.84 | 0.02 ± 0.14 |
|                | A <sub>1</sub> - 06 | VS <sub>I5</sub> | AW <sub>0</sub> | 0    | 0     | 0 ± 0       |
|                | A <sub>1</sub> - 07 | VS <sub>I5</sub> | AW <sub>0</sub> | 47   | 19.74 | 0.07 ± 0.30 |
|                | A <sub>1</sub> - 08 | VS <sub>I5</sub> | AW <sub>0</sub> | 9    | 5.26  | 0.01 ± 0.15 |
|                | A <sub>1</sub> - 09 | VS <sub>I5</sub> | AW <sub>0</sub> | 3    | 1.32  | 0 ± 0.08    |
|                | A <sub>1</sub> - 10 | VS <sub>I5</sub> | AW <sub>0</sub> | 0    | 0     | 0 ± 0       |
| A <sub>2</sub> | A <sub>2</sub> - 01 | VS <sub>I5</sub> | AW <sub>0</sub> | 1261 | 92.11 | 1.78 ± 1.83 |
|                | A <sub>2</sub> - 02 | VS <sub>I5</sub> | AW <sub>0</sub> | 627  | 63.16 | 0.88 ± 1.51 |
|                | A <sub>2</sub> - 03 | VS <sub>I5</sub> | AW <sub>0</sub> | 652  | 59.21 | 0.92 ± 1.54 |
|                | A <sub>2</sub> - 04 | VS <sub>I5</sub> | AW <sub>0</sub> | 2533 | 100   | 3.57 ± 1.97 |
|                | A <sub>2</sub> - 05 | VS <sub>I5</sub> | AW <sub>0</sub> | 75   | 25    | 0.11 ± 0.40 |
| A <sub>3</sub> | A <sub>3</sub> - 01 | VS <sub>I5</sub> | AW <sub>0</sub> | 525  | 57.89 | 0.74 ± 1.35 |
|                | A <sub>3</sub> - 02 | VS <sub>I5</sub> | AW <sub>0</sub> | 292  | 42.11 | 0.41 ± 1.00 |
|                | A <sub>3</sub> - 03 | VS <sub>I5</sub> | AW <sub>0</sub> | 3    | 3.95  | 0 ± 0.07    |
|                | A <sub>3</sub> - 04 | VS <sub>I5</sub> | AW <sub>0</sub> | 22   | 10.53 | 0.03 ± 0.25 |
| A <sub>1</sub> | A <sub>1</sub> - 01 | VS <sub>SD</sub> | -               | 12   | 11.84 | 0.02 ± 0.14 |
|                | A <sub>1</sub> - 02 | VS <sub>SD</sub> | -               | 1849 | 97.37 | 2.61 ± 2.01 |
|                | A <sub>1</sub> - 03 | VS <sub>SD</sub> | -               | 1223 | 88.16 | 1.72 ± 1.83 |
|                | A <sub>1</sub> - 04 | VS <sub>SD</sub> | -               | 7    | 5.26  | 0.01 ± 0.15 |
|                | A <sub>1</sub> - 05 | VS <sub>SD</sub> | -               | 21   | 15.79 | 0.03 ± 0.18 |
|                | A <sub>1</sub> - 06 | VS <sub>SD</sub> | -               | 0    | 0     | 0 ± 0       |

|                |                     |           |           |      |       |                 |
|----------------|---------------------|-----------|-----------|------|-------|-----------------|
|                | A <sub>1</sub> - 07 | $VS_{SD}$ | -         | 181  | 31.58 | $0.26 \pm 0.71$ |
|                | A <sub>1</sub> - 08 | $VS_{SD}$ | -         | 30   | 11.84 | $0.04 \pm 0.23$ |
|                | A <sub>1</sub> - 09 | $VS_{SD}$ | -         | 15   | 9.21  | $0.02 \pm 0.15$ |
|                | A <sub>1</sub> - 10 | $VS_{SD}$ | -         | 4    | 2.63  | $0.01 \pm 0.08$ |
| A <sub>2</sub> | A <sub>2</sub> - 01 | $VS_{SD}$ | -         | 1501 | 94.74 | $2.12 \pm 1.95$ |
|                | A <sub>2</sub> - 02 | $VS_{SD}$ | -         | 722  | 64.47 | $1.02 \pm 1.61$ |
|                | A <sub>2</sub> - 03 | $VS_{SD}$ | -         | 782  | 63.16 | $1.1 \pm 1.69$  |
|                | A <sub>2</sub> - 04 | $VS_{SD}$ | -         | 2859 | 100   | $4.03 \pm 1.83$ |
|                | A <sub>2</sub> - 05 | $VS_{SD}$ | -         | 223  | 59.21 | $0.31 \pm 0.76$ |
| A <sub>3</sub> | A <sub>3</sub> - 01 | $VS_{SD}$ | -         | 697  | 63.16 | $0.98 \pm 1.54$ |
|                | A <sub>3</sub> - 02 | $VS_{SD}$ | -         | 430  | 60.53 | $0.61 \pm 1.22$ |
|                | A <sub>3</sub> - 03 | $VS_{SD}$ | -         | 3    | 2.63  | $0 \pm 0.07$    |
|                | A <sub>3</sub> - 04 | $VS_{SD}$ | -         | 34   | 15.79 | $0.05 \pm 0.31$ |
| A <sub>1</sub> | A <sub>1</sub> - 01 | $VS_{OD}$ | $AW_{I5}$ | 0    | 0     | $0 \pm 0$       |
|                | A <sub>1</sub> - 02 | $VS_{OD}$ | $AW_{I5}$ | 1324 | 88.16 | $1.87 \pm 1.94$ |
|                | A <sub>1</sub> - 03 | $VS_{OD}$ | $AW_{I5}$ | 877  | 81.58 | $1.24 \pm 1.59$ |
|                | A <sub>1</sub> - 04 | $VS_{OD}$ | $AW_{I5}$ | 4    | 3.95  | $0.01 \pm 0.09$ |
|                | A <sub>1</sub> - 05 | $VS_{OD}$ | $AW_{I5}$ | 4    | 5.26  | $0.01 \pm 0.08$ |
|                | A <sub>1</sub> - 06 | $VS_{OD}$ | $AW_{I5}$ | 0    | 0     | $0 \pm 0$       |
|                | A <sub>1</sub> - 07 | $VS_{OD}$ | $AW_{I5}$ | 88   | 21.05 | $0.12 \pm 0.46$ |
|                | A <sub>1</sub> - 08 | $VS_{OD}$ | $AW_{I5}$ | 14   | 7.89  | $0.02 \pm 0.18$ |
|                | A <sub>1</sub> - 09 | $VS_{OD}$ | $AW_{I5}$ | 4    | 3.95  | $0.01 \pm 0.08$ |
|                | A <sub>1</sub> - 10 | $VS_{OD}$ | $AW_{I5}$ | 0    | 0     | $0 \pm 0$       |
| A <sub>2</sub> | A <sub>2</sub> - 01 | $VS_{OD}$ | $AW_{I5}$ | 1107 | 84.21 | $1.56 \pm 1.76$ |
|                | A <sub>2</sub> - 02 | $VS_{OD}$ | $AW_{I5}$ | 537  | 51.32 | $0.76 \pm 1.45$ |
|                | A <sub>2</sub> - 03 | $VS_{OD}$ | $AW_{I5}$ | 641  | 60.53 | $0.90 \pm 1.53$ |
|                | A <sub>2</sub> - 04 | $VS_{OD}$ | $AW_{I5}$ | 2460 | 100   | $3.47 \pm 2.05$ |
|                | A <sub>2</sub> - 05 | $VS_{OD}$ | $AW_{I5}$ | 32   | 14.47 | $0.05 \pm 0.27$ |
| A <sub>3</sub> | A <sub>3</sub> - 01 | $VS_{OD}$ | $AW_{I5}$ | 471  | 53.95 | $0.66 \pm 1.31$ |
|                | A <sub>3</sub> - 02 | $VS_{OD}$ | $AW_{I5}$ | 254  | 43.42 | $0.36 \pm 0.96$ |
|                | A <sub>3</sub> - 03 | $VS_{OD}$ | $AW_{I5}$ | 0    | 0     | $0 \pm 0$       |
|                | A <sub>3</sub> - 04 | $VS_{OD}$ | $AW_{I5}$ | 18   | 9.21  | $0.03 \pm 0.21$ |
| A <sub>1</sub> | A <sub>1</sub> - 01 | $VS_{OD}$ | $AW_I$    | 0    | 0     | $0 \pm 0$       |
|                | A <sub>1</sub> - 02 | $VS_{OD}$ | $AW_I$    | 873  | 59.21 | $1.23 \pm 1.71$ |
|                | A <sub>1</sub> - 03 | $VS_{OD}$ | $AW_I$    | 516  | 56.58 | $0.73 \pm 1.32$ |
|                | A <sub>1</sub> - 04 | $VS_{OD}$ | $AW_I$    | 0    | 0     | $0 \pm 0$       |
|                | A <sub>1</sub> - 05 | $VS_{OD}$ | $AW_I$    | 2    | 2.63  | $0 \pm 0$       |
|                | A <sub>1</sub> - 06 | $VS_{OD}$ | $AW_I$    | 0    | 0     | $0 \pm 0$       |
|                | A <sub>1</sub> - 07 | $VS_{OD}$ | $AW_I$    | 35   | 14.47 | $0.05 \pm 0.25$ |
|                | A <sub>1</sub> - 08 | $VS_{OD}$ | $AW_I$    | 2    | 2.63  | $0 \pm 0.05$    |
|                | A <sub>1</sub> - 09 | $VS_{OD}$ | $AW_I$    | 2    | 2.63  | $0 \pm 0.05$    |
|                | A <sub>1</sub> - 10 | $VS_{OD}$ | $AW_I$    | 0    | 0     | $0 \pm 0$       |
| A <sub>2</sub> | A <sub>2</sub> - 01 | $VS_{OD}$ | $AW_I$    | 701  | 67.11 | $0.99 \pm 1.52$ |

|                |                     |           |        |      |       |                 |
|----------------|---------------------|-----------|--------|------|-------|-----------------|
|                | A <sub>2</sub> - 02 | $VS_{OD}$ | $AW_l$ | 369  | 38.16 | $0.52 \pm 1.24$ |
|                | A <sub>2</sub> - 03 | $VS_{OD}$ | $AW_l$ | 501  | 53.95 | $0.71 \pm 1.41$ |
|                | A <sub>2</sub> - 04 | $VS_{OD}$ | $AW_l$ | 2011 | 93.42 | $2.84 \pm 2.21$ |
|                | A <sub>2</sub> - 05 | $VS_{OD}$ | $AW_l$ | 6    | 3.95  | $0.01 \pm 0.14$ |
| A <sub>3</sub> | A <sub>3</sub> - 01 | $VS_{OD}$ | $AW_l$ | 284  | 39.47 | $0.4 \pm 1.04$  |
|                | A <sub>3</sub> - 02 | $VS_{OD}$ | $AW_l$ | 107  | 26.32 | $0.15 \pm 0.58$ |
|                | A <sub>3</sub> - 03 | $VS_{OD}$ | $AW_l$ | 0    | 0     | $0 \pm 0$       |
|                | A <sub>3</sub> - 04 | $VS_{OD}$ | $AW_l$ | 9    | 3.95  | $0.01 \pm 0.15$ |
| A <sub>1</sub> | A <sub>1</sub> - 01 | $VS_{OD}$ | $AW_4$ | 0    | 0     | $0 \pm 0$       |
|                | A <sub>1</sub> - 02 | $VS_{OD}$ | $AW_4$ | 563  | 46.05 | $0.79 \pm 1.42$ |
|                | A <sub>1</sub> - 03 | $VS_{OD}$ | $AW_4$ | 306  | 42.11 | $0.43 \pm 1.08$ |
|                | A <sub>1</sub> - 04 | $VS_{OD}$ | $AW_4$ | 0    | 0     | $0 \pm 0$       |
|                | A <sub>1</sub> - 05 | $VS_{OD}$ | $AW_4$ | 0    | 0     | $0 \pm 0$       |
|                | A <sub>1</sub> - 06 | $VS_{OD}$ | $AW_4$ | 0    | 0     | $0 \pm 0$       |
|                | A <sub>1</sub> - 07 | $VS_{OD}$ | $AW_4$ | 13   | 7.89  | $0.02 \pm 0.14$ |
|                | A <sub>1</sub> - 08 | $VS_{OD}$ | $AW_4$ | 0    | 0     | $0 \pm 0$       |
|                | A <sub>1</sub> - 09 | $VS_{OD}$ | $AW_4$ | 1    | 1.32  | $0 \pm 0.04$    |
|                | A <sub>1</sub> - 10 | $VS_{OD}$ | $AW_4$ | 0    | 0     | $0 \pm 0$       |
| A <sub>2</sub> | A <sub>2</sub> - 01 | $VS_{OD}$ | $AW_4$ | 441  | 51.32 | $0.62 \pm 1.29$ |
|                | A <sub>2</sub> - 02 | $VS_{OD}$ | $AW_4$ | 255  | 26.32 | $0.36 \pm 1.05$ |
|                | A <sub>2</sub> - 03 | $VS_{OD}$ | $AW_4$ | 393  | 42.11 | $0.55 \pm 1.30$ |
|                | A <sub>2</sub> - 04 | $VS_{OD}$ | $AW_4$ | 1685 | 84.21 | $2.38 \pm 2.25$ |
|                | A <sub>2</sub> - 05 | $VS_{OD}$ | $AW_4$ | 3    | 1.32  | $0 \pm 0.11$    |
| A <sub>3</sub> | A <sub>3</sub> - 01 | $VS_{OD}$ | $AW_4$ | 172  | 25    | $0.24 \pm 0.84$ |
|                | A <sub>3</sub> - 02 | $VS_{OD}$ | $AW_4$ | 46   | 14.47 | $0.06 \pm 0.37$ |
|                | A <sub>3</sub> - 03 | $VS_{OD}$ | $AW_4$ | 0    | 0     | $0 \pm 0$       |
|                | A <sub>3</sub> - 04 | $VS_{OD}$ | $AW_4$ | 5    | 1.32  | $0.01 \pm 0.12$ |
